# Supplementary material
Source: Springer Nature journal article supplement (https://www.springermedizin.de/resource/supplementary/12974_2011_486_MOESM6_ESM.pdf/9601398)

before PDT

after PDT

Control

VEGFR1 Fc

Control

VEGFR1 Fc

100  $\mu$ m

50  $\mu$ m

A

B

C

D

E

F

G

H

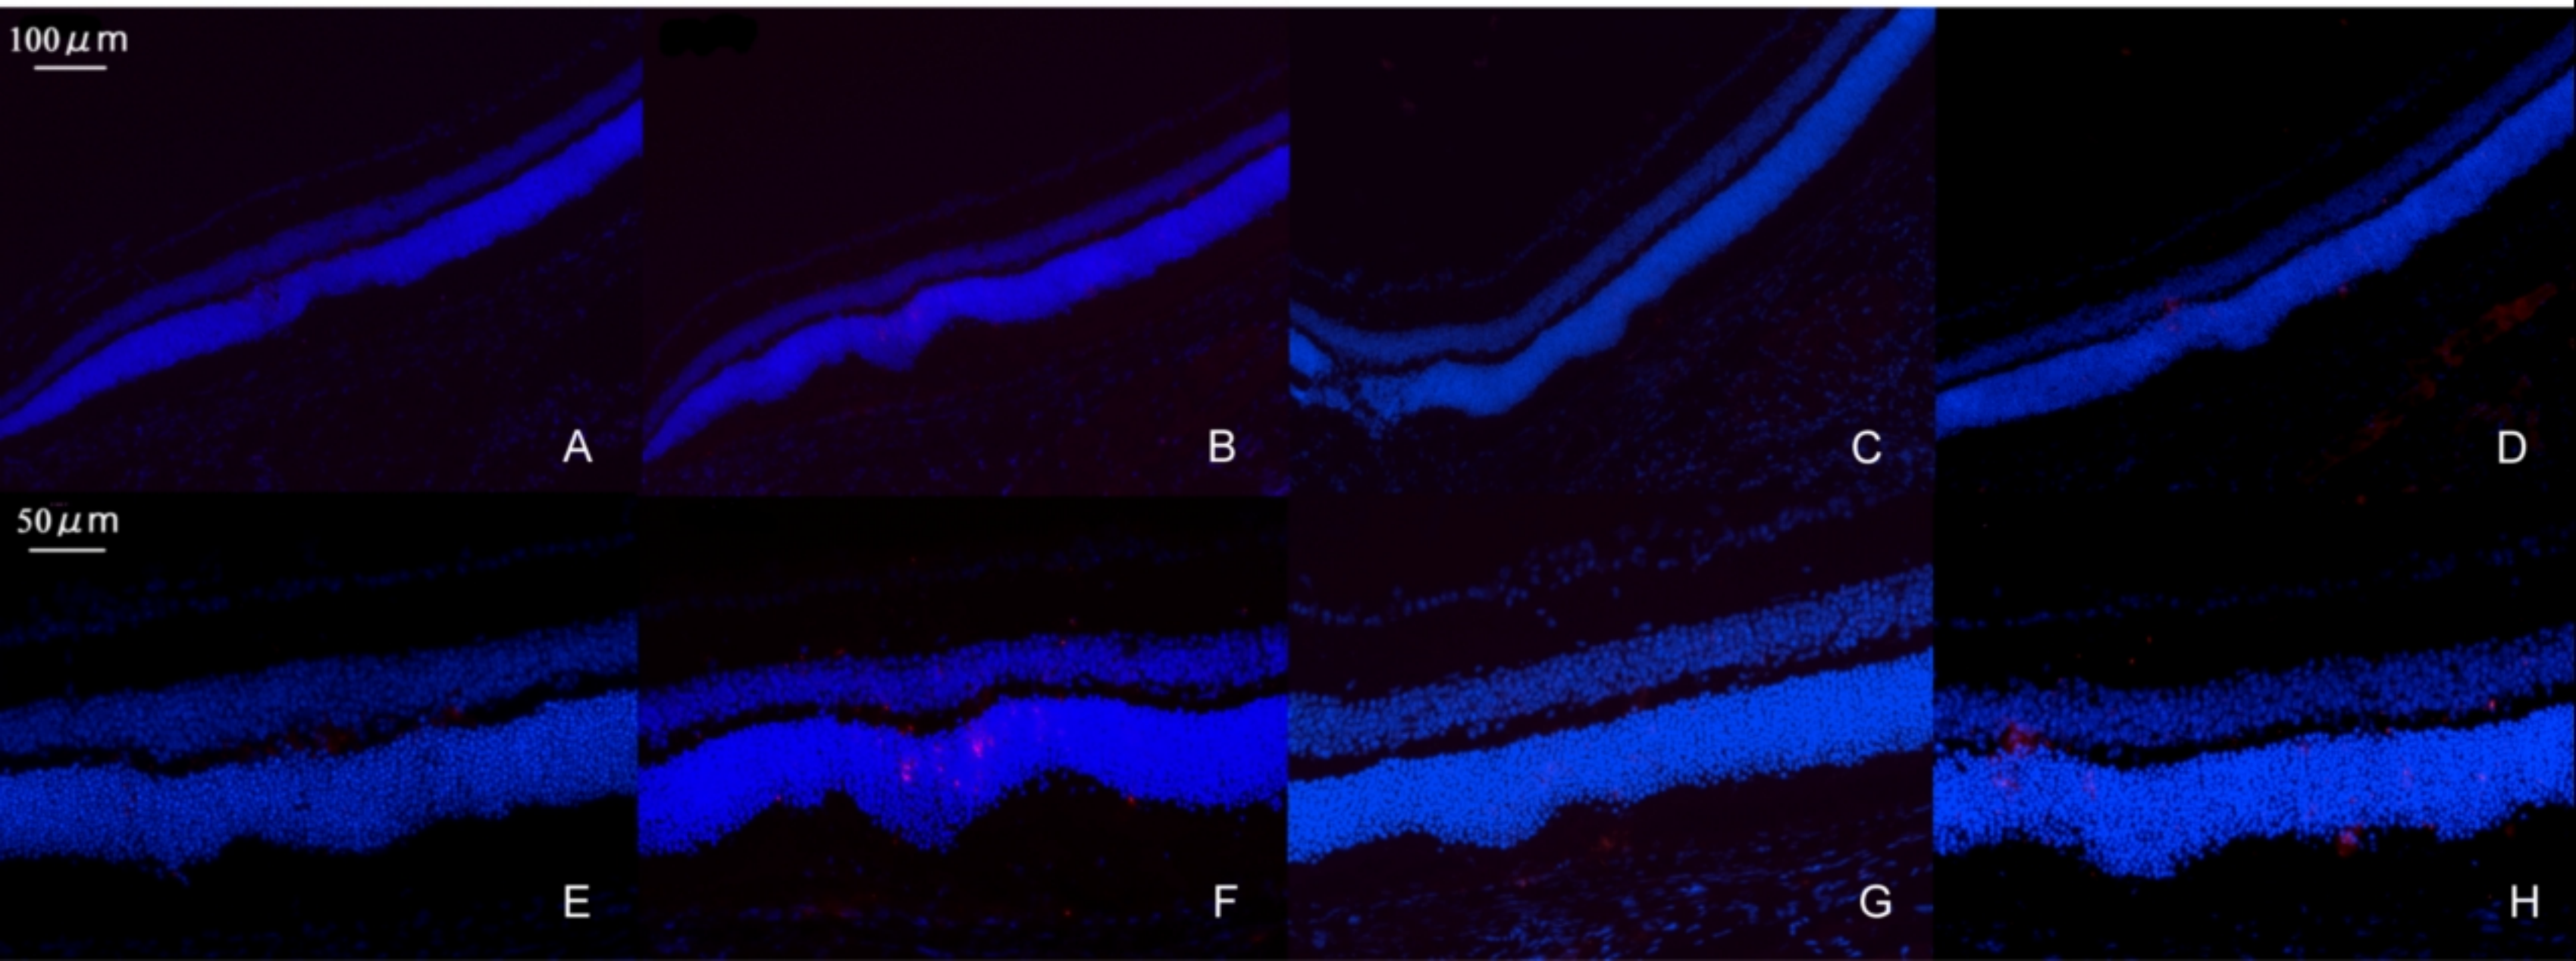

Supplement: MOESM6 [file 9601398]
